# Supplementary material for: Annealing-free preparation of anatase TiO2 nanopopcorns on Ti foil via a hydrothermal process and their photocatalytic and photovoltaic applications
Source: Royal Society of Chemistry journal article supplement (doi:10.1039/c3ta10320j), 2013-01-01
Supplement: c3ta10320j.pdf [file c3ta10320j.pdf]

## Supplementary Data

### Annealing-Free Preparation of Anatase TiO<sub>2</sub> Nanopopcorns on Ti Foil via a Hydrothermal Process and Their Photocatalytic and Photovoltaic Applications

Jong-Yeob Kim,<sup>a</sup> Daeki Lee,<sup>a</sup> Hark Jin Kim,<sup>b</sup> Iseul Lim,<sup>b</sup> Wan In Lee<sup>b</sup> and Du-Jeon Jang<sup>\*a</sup>

<sup>a</sup> Department of Chemistry, Seoul National University, Seoul 151-747, Korea. Tel: +82 (2)-875-6624; E-mail: djjang@snu.ac.kr

<sup>b</sup> Department of Chemistry, Inha University, Incheon 402-751, Korea

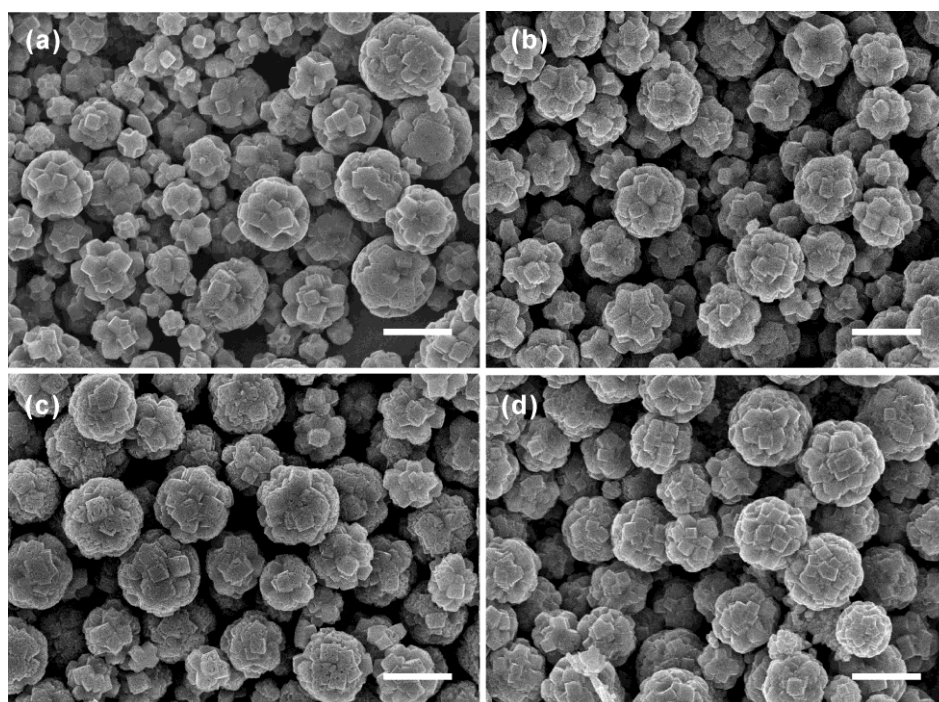

**Fig. S1** SEM images of TiO<sub>2</sub> nanopopcorns grown on Ti foil with VR(H<sub>2</sub>O<sub>2</sub>:HF:H<sub>2</sub>O) of (a) 0.5:1:1000, (b) 1:1:1000, (c) 2.5:1:1000, and (d) 5:1:1000. Each scale bar indicates 500 nm.

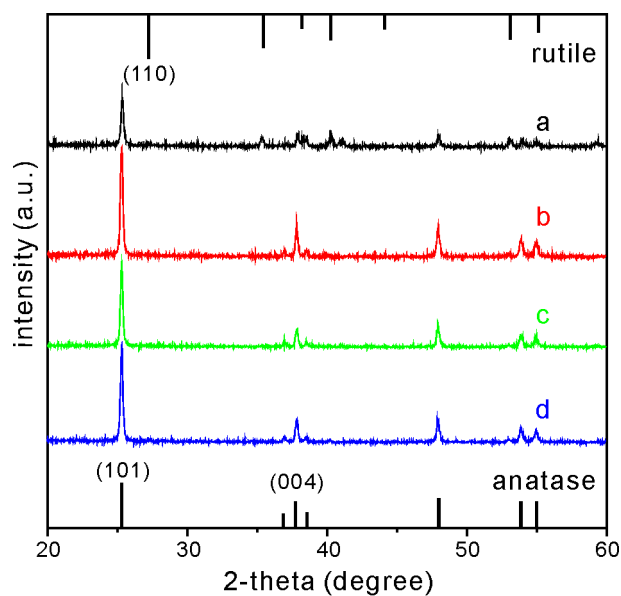

**Fig. S2** XRD patterns of TiO<sub>2</sub> nanopopcorns grown on Ti foil at VR(H<sub>2</sub>O<sub>2</sub>:HF:H<sub>2</sub>O) of (a) 0.5:1:1000, (b) 1:1:1000, (c) 1:2.5:1000, and (d) 5:1:1000. The standard diffraction lines of anatase TiO<sub>2</sub> and rutile TiO<sub>2</sub> are also shown for comparison.

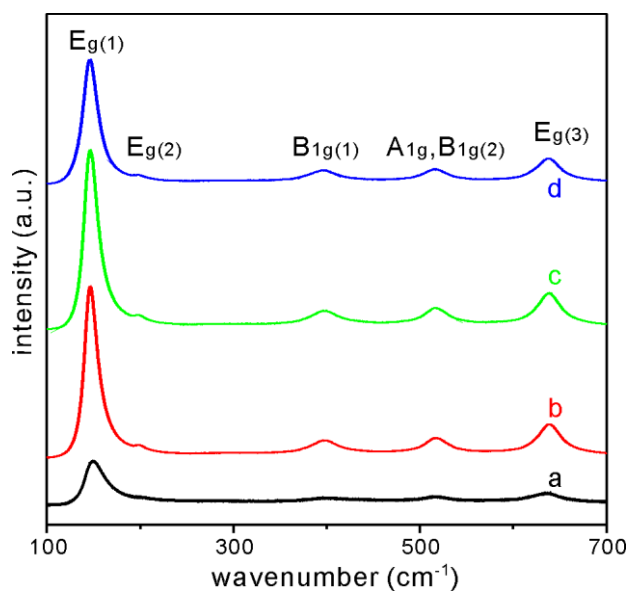

**Fig. S3** Raman spectra of TiO<sub>2</sub> nanopopcorns grown on Ti foil with VR(H<sub>2</sub>O<sub>2</sub>:HF:H<sub>2</sub>O) of (a) 1:0.5:1000, (b) 1:1:1000, (c) 1:2.5:1000, and (d) 1:5:1000.

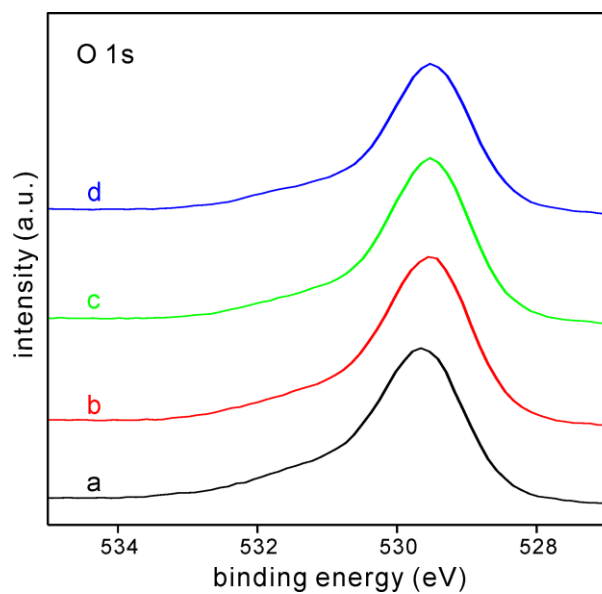

**Fig. S4** XPS spectra of the O1s of TiO<sub>2</sub> nanopopcorns grown on Ti foil with VR(H<sub>2</sub>O<sub>2</sub>:HF:H<sub>2</sub>O) of (a) 1:0.5:1000, (b) 1:1:1000, (c) 1:2.5:1000, and (d) 1:5:1000.

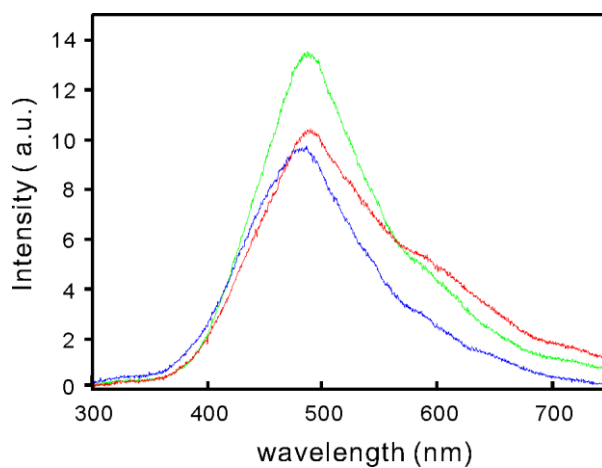

**Fig. S5** Photoluminescence spectra of TiO<sub>2</sub> nanopopcorns grown on Ti foil. VR(H<sub>2</sub>O<sub>2</sub>:HF:H<sub>2</sub>O) were (*blue*) 1:1:1000, (*green*) 1:2.5:1000, (*red*) 2.5:1:1000, and samples were suspended in water and excited at 266 nm.

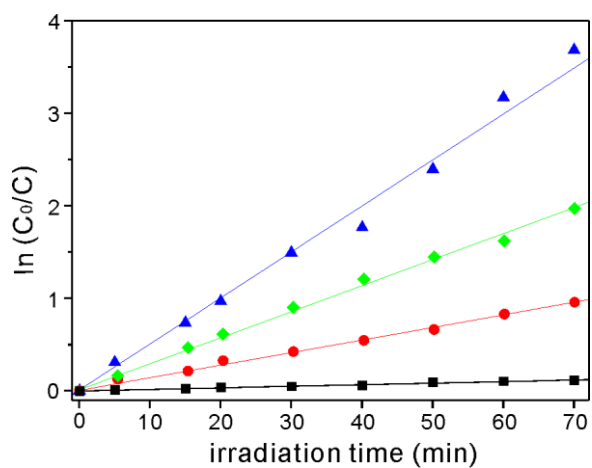

**Fig. S6** Pseudo-first-order kinetic rate plots for the photocatalytic degradation of MB (360 ppm) at different concentrations of TiO<sub>2</sub> nanopopcorns grown at VR(H<sub>2</sub>O<sub>2</sub>:HF:H<sub>2</sub>O) of 1:1:1000 on Ti foil. The masses of suspended nanopopcorns in 2 mL of water were (squares) 0.0, (circles) 1.2, (diamonds) 2.4, and (triangles) 4.8 mg. The rate constants obtained from the best-fitted lines with the nanopopcorns of 0.0, 1.2, 2.4, and 4.8 mg are 0.11, 0.96, 1.8, and 3.0 h<sup>-1</sup>, respectively
